# Supplementary material
Source: Springer Nature journal article supplement (https://www.springermedizin.de/resource/supplementary/13053_2009_143_MOESM1_ESM.pdf/9674286)
Supplement: MOESM1 [file 9674286]

Invited to the study  
310

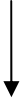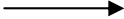

No contact  
56

Contact with  
oncogenetic clinic  
254

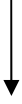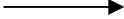

Refused  
participation  
39

Included in the study  
215

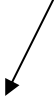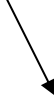

55 cancer affected and  
160 non-affected

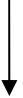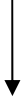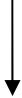

1<sup>st</sup> questionnaire  
213 respondents

2<sup>nd</sup> questionnaire  
164 respondents

3<sup>rd</sup> questionnaire  
145 respondents
